# Supplementary material for: Swelling and Diffusion in Polymerized Ionic Liquids-Based Hydrogels
Source: Polymers (Basel). 2021 Jun 1;13(11):1834. doi: 10.3390/polym13111834 (PMC8199506; doi:10.3390/polym13111834)
Supplement: Supplementary file 1 [file polymers-13-01834-s001.zip › polymers-1239810-supplementary.pdf]

## Article

# Swelling and Diffusion in Polymerized Ionic Liquids-Based Hydrogels

Ann Jastram <sup>1</sup>, Tobias Lindner <sup>2</sup>, Christian Luebbert <sup>3</sup>, Gabriele Sadowski <sup>4</sup> and Udo Kragl <sup>1,5,\*</sup>

<sup>1</sup> Institute of Chemistry, Industrial Chemistry, University of Rostock, Albert-Einstein-Str. 3a, 18059 Rostock, Germany; ann.jastram@uni-rostock.de

<sup>2</sup> Core Facility Multimodal Small Animal Imaging, Rostock University Medical Center, Schillingallee 69a, 18057 Rostock, Germany; tobias.lindner@med.uni-rostock.de

<sup>3</sup> amofor GmbH, Otto-Hahn-Str. 15, 44227 Dortmund, Germany; luebbert@amofor.de

<sup>4</sup> Department of Biochemical and Chemical Engineering, Laboratory of Thermodynamics, TU Dortmund University, Emil-Figge-Str. 70, 44227 Dortmund, Germany; gabriele.sadowski@tu-dortmund.de

<sup>5</sup> Department Life, Light & Matter, Faculty for Interdisciplinary Research, University of Rostock, Albert-Einstein-Str. 25, 18059, Rostock, Germany

\* Correspondence: udo.kragl@uni-rostock.de; Tel.: +49-381-498-6450

**Citation:** Jastram, A.; Lindner, T.; Luebbert, C.; Sadowski, G.; Kragl, U. Swelling and Diffusion in Polymerized Ionic Liquids-Based Hydrogels. *Polymers* **2021**, *13*, 1834. <https://doi.org/10.3390/polym13111834>

Academic Editor: Ciprian Iacob

Received: 13 May 2021

Accepted: 26 May 2021

Published: 1 May 2021

**Publisher's Note:** MDPI stays neutral with regard to jurisdictional claims in published maps and institutional affiliations.

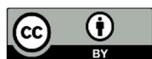

**Copyright:** © 2021 by the authors. Licensee MDPI, Basel, Switzerland. This article is an open access article distributed under the terms and conditions of the Creative Commons Attribution (CC BY) license (<http://creativecommons.org/licenses/by/4.0/>).

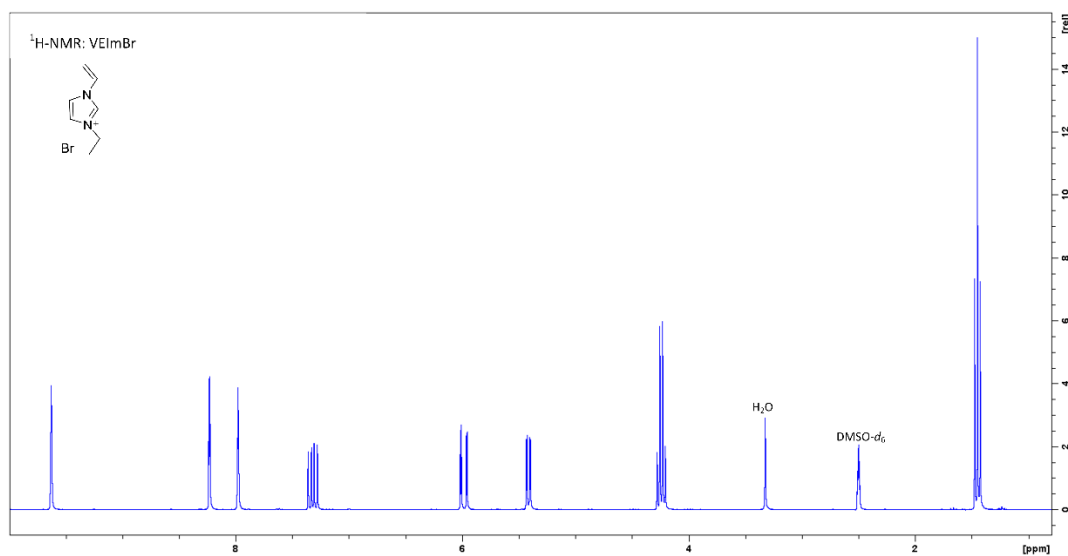Figure S1. <sup>1</sup>H-NMR of VEImBr [300 MHz].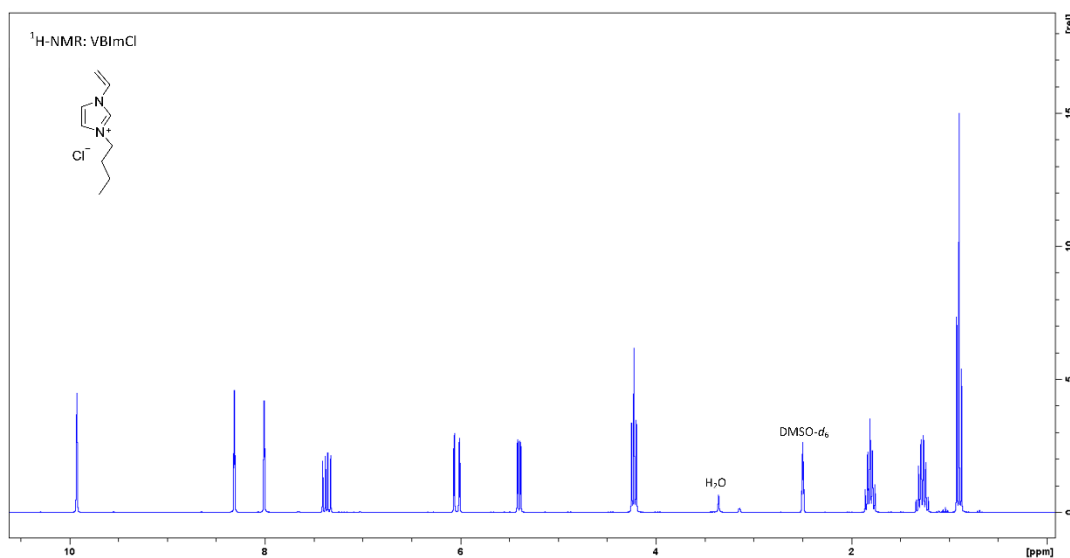Figure S2. <sup>1</sup>H-NMR of VBImCl [300 MHz].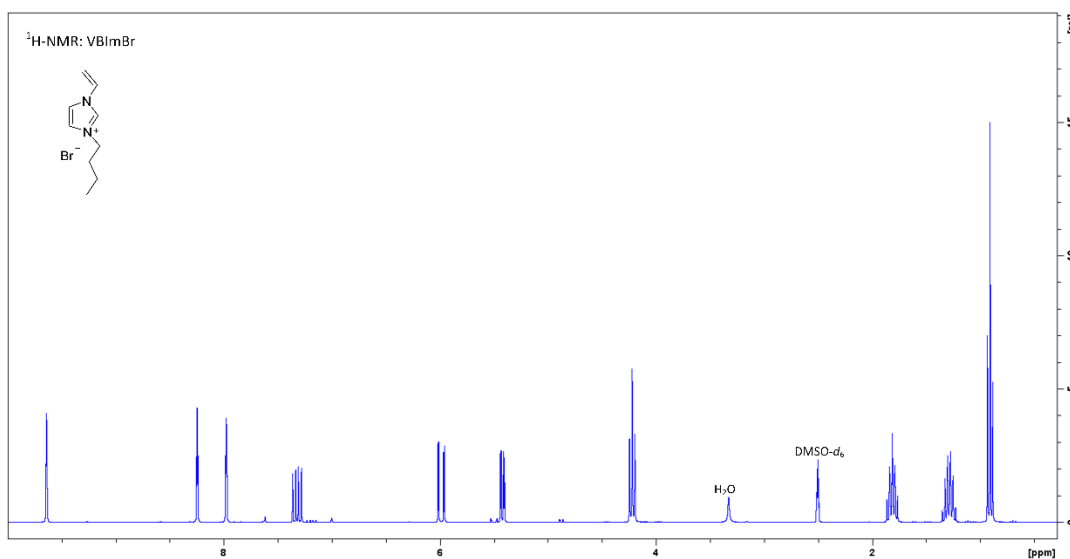Figure S3. <sup>1</sup>H-NMR of VBImBr [300 MHz].
